# Supplementary material for: Soybean-derived blue photoluminescent carbon dots
Source: PubMed Central journal article supplement (PMC7155895; doi:10.3762/bjnano.11.48), 2020-04-09
Supplement: Beilstein_J_Nanotechnol-11-606-s001.pdf [file Beilstein_J_Nanotechnol-11-606-s001.pdf]

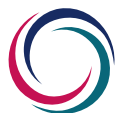

## Supporting Information

for

### **Soybean-derived blue photoluminescent carbon dots**

Shanshan Wang, Wei Sun, Dong-sheng Yang and Fuqian Yang

*Beilstein J. Nanotechnol.* **2020**, *11*, 606–619. [doi:10.3762/bjnano.11.48](https://doi.org/10.3762/bjnano.11.48)

### **Additional experimental data**

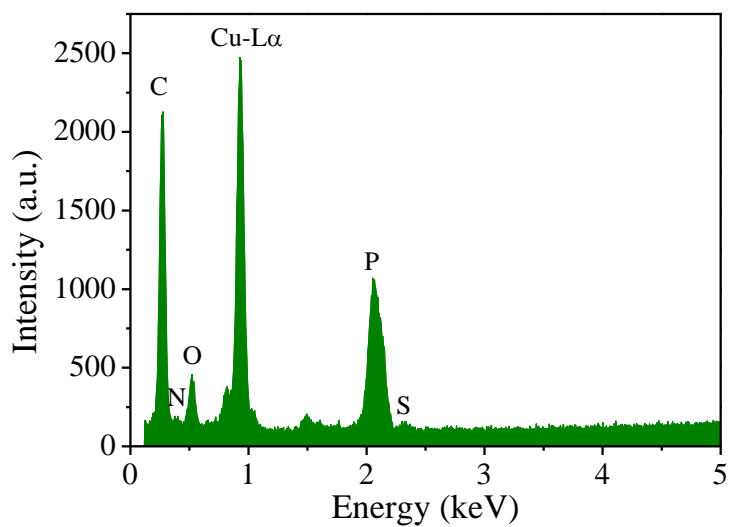

**Figure S1:** EDX spectrum of HTC-CDs.

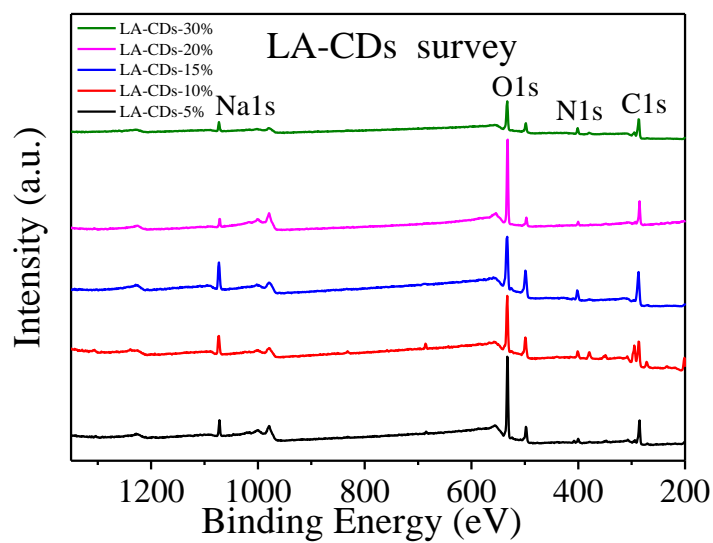

**Figure S2:** XPS survey spectra of LA-CDs-x%.

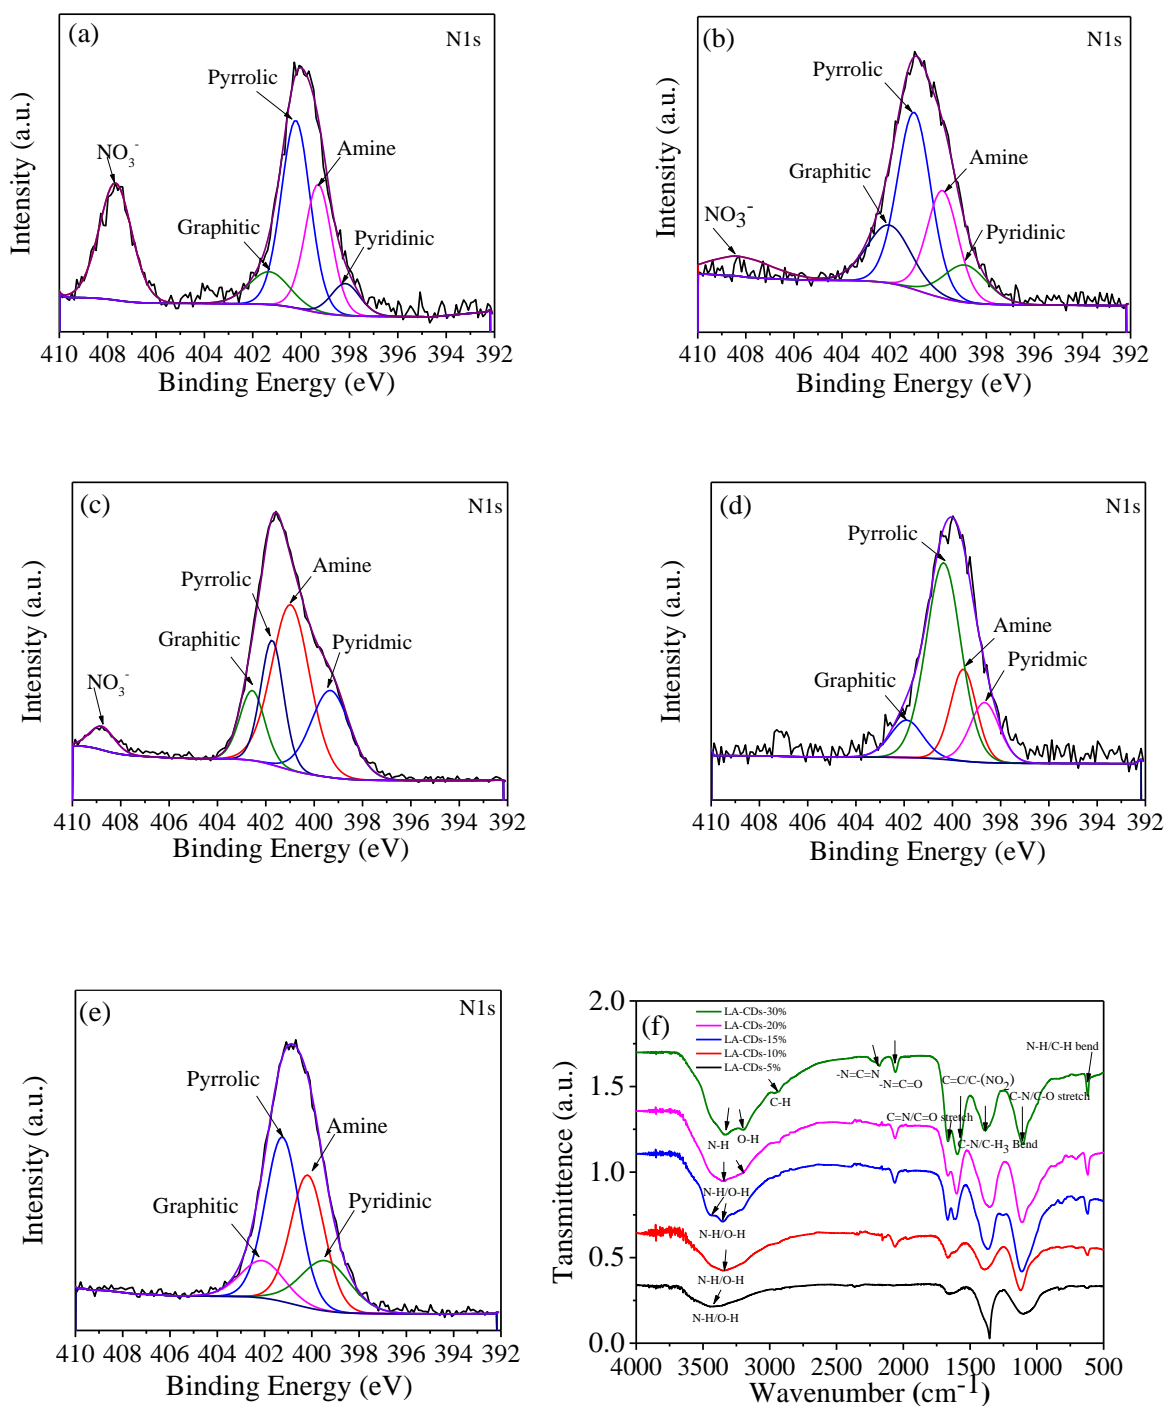

**Figure S3:** Deconvoluted high resolution spectra of N1s: (a) LA-CDs-5%, (b) LA-CDs-10%  $\text{NH}_4\text{OH}$ , (c) LA-CDs-15%, (d) LA-CDs-20%, and (e) LA-CDs-30%; (f) FTIR spectra of LA-CDs-x%.

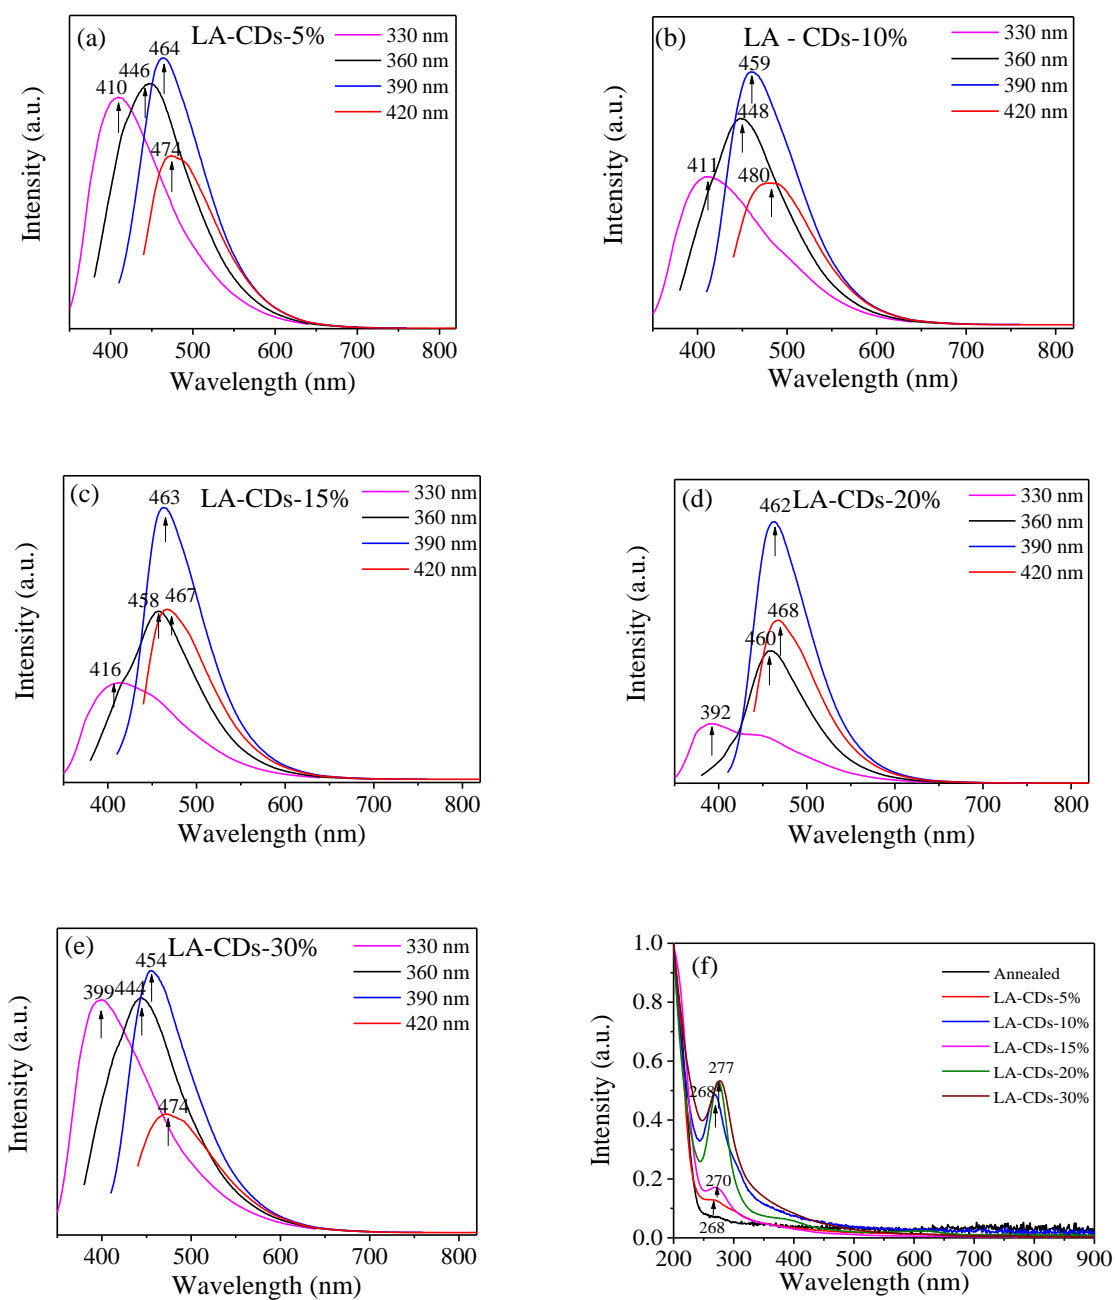

**Figure S4:** PL spectra of LA-CDs-x%: (a) x = 5, (b) x = 10, (c) x = 15, (d) x = 20, and (e) x = 30; (f) UV-visible absorption spectra of LA-CDs-x%.

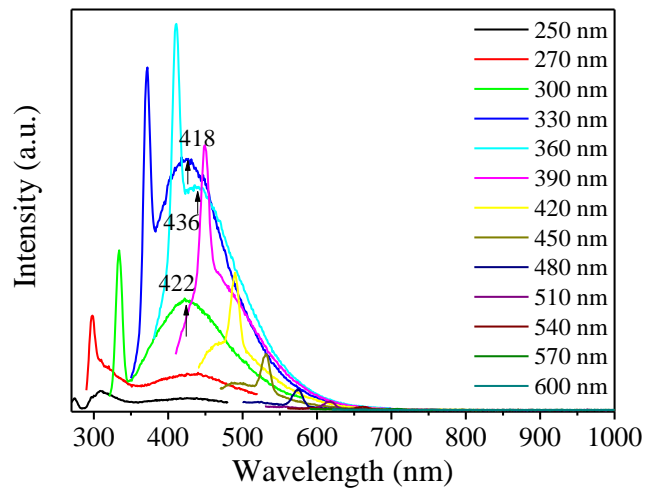

**Figure S5:** PL spectra of laser-ablated Teflon in deionized water.

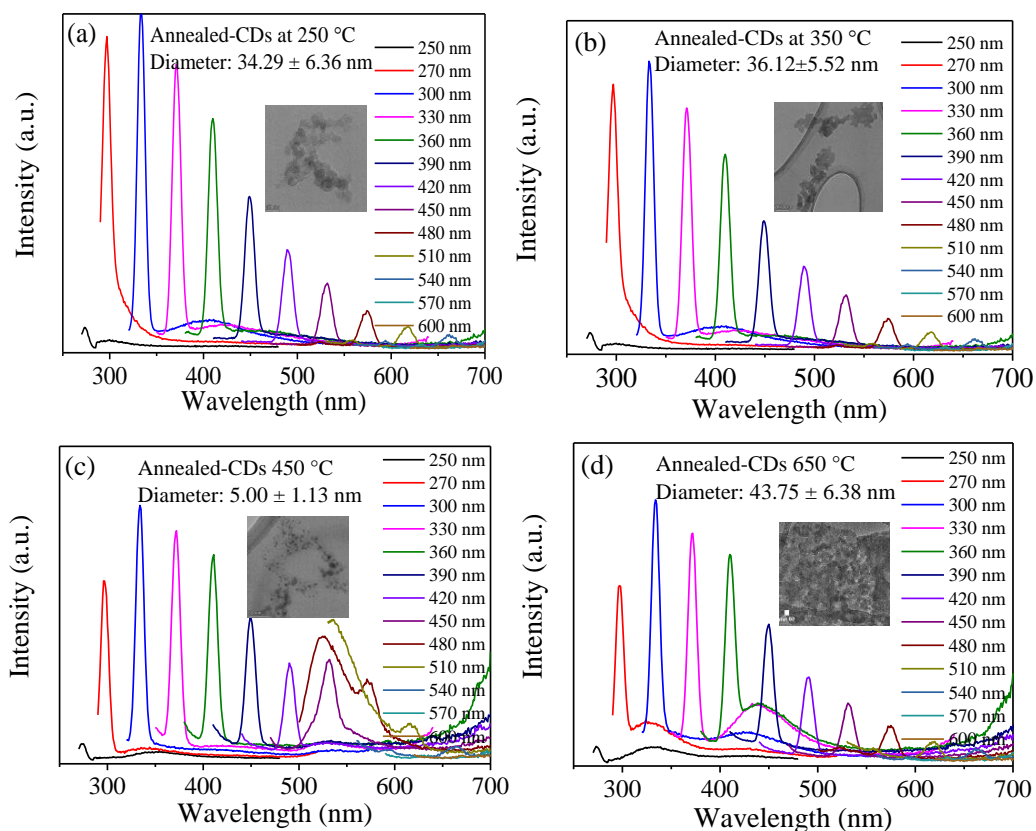

**Figure S6:** PL spectra of annealed soybean at different temperatures with the flow of argon gas for 2 h.

**Table S1:** Element fractions in the soybean-derived carbon nanoparticles calculated from the XPS spectra.

|              | C 1s | N 1s | O 1s |
|--------------|------|------|------|
| HTC-CDs      | 73.6 | 10.3 | 16.1 |
| Annealed-CDs | 60.0 | 0    | 40.0 |
| LA-CDs-10%   | 51.1 | 4.4  | 44.5 |

**Table S2:** Element fractions in LA-CDs-x% calculated from the XPS spectra.

| Element | LA-CDs-5%     |        | LA-CDs-10%    |        | LA-CDs-15%    |        | LA-CDs-20%    |        | LA-CDs-30%    |        |
|---------|---------------|--------|---------------|--------|---------------|--------|---------------|--------|---------------|--------|
|         | Position (eV) | atom % | Position (eV) | atom % | Position (eV) | atom % | Position (eV) | atom % | Position (eV) | atom % |
| C       | 285.4         | 42.6   | 286.4         | 51.1   | 287.2         | 54.7   | 285.2         | 38.9   | 287.9         | 60.1   |
| N       | 400.1         | 3.8    | 400.8         | 4.4    | 401.4         | 7.8    | 400.3         | 4.7    | 402.1         | 5.2    |
| O       | 532.7         | 53.6   | 533.1         | 44.5   | 533.4         | 37.5   | 532.4         | 56.4   | 534.6         | 34.7   |

**Table S3:** Area ratios of bond structures in LA-CDs-x% calculated from the XPS spectra.

| Name/Area Ratio% | Graphitic | Pyrrolic | Amine | Pyridinic |
|------------------|-----------|----------|-------|-----------|
| LA-CDs-5%        | 8.3       | 49.4     | 30.9  | 8.4       |
| LA-CDs-10%       | 19.0      | 44.0     | 25.1  | 11.9      |
| LA-CDs-15%       | 12.3      | 19.8     | 44.1  | 23.8      |
| LA-CDs-20%       | 10.1      | 55.9     | 19.5  | 14.5      |
| LA-CDs-30%       | 11.4      | 39.4     | 31.9  | 17.3      |

Absolute Quantum yield (QY) measurement with integrating sphere: The QY was measured and calculated on Fluoromax-4 using integrating sphere according to the following equation as below:

$$QY = \frac{\text{Number of emitted photos}}{\text{Number of absorbed photos}} = \frac{P_b - P_a}{L_b - L_a}$$

$L_b$  = Total number of incident photons,  $L_a$ =Total photos not absorbed by sample.

$P_a$  = “Dark signal” in the emission wavelength area,  $P_b$ =Total number of photons emitted in emission wavelength area.
